# Supplementary material for: Implementing interpreter training for dementia assessments at national scale using the RE-AIM framework: A mixed-methods evaluation
Source: Research Square preprint supplement (doi:10.21203/rs.3.rs-8208390/v1), 2025-12-19
Supplement: Supplementary file 2 [file 2a3059e33e736bf2f5af4645.docx]

**Implementing interpreter training for dementia assessments at national scale using the RE-AIM framework: A mixed-methods evaluation**

## Additional file 1: Multiple choice assessment quiz for training

1. What is a memory clinic?
2. A specialist clinic for people experiencing cognitive disorders
3. A practitioner who brings comfort to people by getting them to talk about their past
4. Somewhere people go to do brain exercises and improve their memory
5. Whose responsibility is it to **seek an older person's consent** to use an interpreter during a cognitive assessment?
6. The interpreter
7. The older person's family
8. The clinician/assessor
9. Who should decide whether an **older person's family is present** during an interpreter-mediated cognitive assessment?
10. The assessor/clinician
11. The family
12. The older person
13. The interpreter
14. The **Rowland Universal Dementia Assessment Scale** (RUDAS) is a type of:
15. Neurological examination
16. Memory test
17. Cognitive screening tool

These questions are based on the**Dementia knowledge assessment scale (DKAS), Communication and Behaviour domain**

Please select whether each statement is **true** or **false**

1. It is impossible to communicate with a person who has advanced dementia

Select one:

1. True
2. False
3. A person experiencing advanced dementia will generally respond to changes in their physical environment

Select one:

1. True
2. False
3. It is important to correct a person with dementia when they are confused

Select one:

1. True
2. False
3. People experiencing advanced dementia often communicate through body language

Select one:

1. True
2. False
3. Uncharacteristic behaviours in a person experiencing dementia are generally a response to unmet needs

Select one:

1. True
2. False
3. Medication is the only effective way of treating behavioural symptoms of dementia

Select one:

1. True
2. False
3. What should an interpreter do when a client responds in a way that might seem illogical to clinicians but makes sense in the client's culture?
4. Criticise the clinician for being culturally insensitive.
5. Do nothing because the interpreter's role is limited to relaying speech between languages.
6. Inform the clinician that there's a culturally based reason for the client's response, which the clinician may be unaware of. Then inform the client about what you have just said to the clinician.
7. What steps might a clinician take to communicate a dementia diagnosis to a non-English speaking older person in a culturally sensitive way?
8. Acknowledge their professional obligations and cultural differences
9. Acknowledge cultural differences, foreshadow their concerns, acknowledge their professional obligations
10. Discretely inform the older person's family about the diagnosis. Then leave it up to them to disclose this to the older person at a more appropriate time.
11. What would be appropriate to discuss during briefings and debriefings? For each item, please select **briefing**or **debriefing.**

If you don't think it's appropriate to discuss that item in either, **select not appropriate.**

| Discuss any relevant background about the client | Briefing |
| --- | --- |
| Ask whether family will be present | Briefing |
| Discuss how the assessment went | Debriefing |
| Discuss any issues with the client's speech | Debriefing |
| Ask how clinician wants to manage family involvement | Briefing |
| Explain any difficulties interpreting terms | Debriefing |
| Ask whether the client has dementia | Not appropriate |
| Discuss how introductions will proceed | Briefing |
| Discuss the form of interpreting used (i.e. consecutive or simultaneous) | Briefing |
| Discuss the assessment tools being used | Briefing |
| Ask whether the assessment tool has been validated | Not appropriate |
| Discuss any relevant cultural etiquette | Briefing |
| Offer your opinion on client's diagnosis | Not appropriate |

An interaction has already commenced and you are in the course of interpreting the clinician’s instructions to a client and interpreting the client’s responses to the clinician. This segment of turns occurs about 10 minutes into the interaction.

**Clinician:**Okay, the next thing that I am going to ask you is for you to show me different parts of the body.

**Interpreter [in LOTE]:**Okay, the next thing that I am going to ask you is for you to show me different parts of the body.

**Client:**OK

**Interpreter [in English]:**OK

**Clinician:**Could youpoint to your right foot?

**Interpreter [in LOTE]:**Could youpoint to your right foot?

**Client:**[visibly confused]Ummm

**Interpreter [in English, with tone of confusion]:**Um

**Clinician:**Which is your right foot?

**Interpreter [in LOTE]:**Which is your right foot?

**Client:**[visibly confused]I’m not sure.

**Interpreter [in English, with tone of confusion]:**I’m not sure.

**Clinician:**Can you point to your right foot?

**Interpreter [in LOTE]:**Can you point to your right foot?

**Client:**[slowly points to right foot, to interpreter]Does she mean this?

**Interpreter [in English]:**The client addressed me and asked “Does she mean this”?

**Clinician:**Yes. That’s great. Now can you show me your left hand?

**Interpreter [in LOTE]:**Yes. That’s great. Now can you show me your left hand?

**Client:**[silently lifts right hand]

**Clinician:**Thank you. Now could you touch your left shoulder with your right hand.

**Interpreter [in LOTE]:**Thank you. Now could you touch your left shoulder with your right hand.

**Client:**[visibly confused]Oh. Ummmm… Sorry what was that?

**Interpreter [in English, with tone of confusion**]Oh. Um… Sorry what was that?

1. In the situation above the client is confused and is finding it difficult to follow the instructions from the clinician. How can an interpreter best handle the situation?
2. An interpreter is responsible for the communication between both parties. In this scenario, it is clear that the client is confused, distressed and having great difficulty following the clinician´s prompts. For these reasons, it is paramount that the interpreter urges the clinician to change their clinical approach.
3. The interpreter is not there to judge the client´s comfort level. The interpreter renders the client´s hesitations, confusion, and negative responses by transferring the content, manner and tone of the speech as uttered in the source language.
4. In a patient-centered approach, the interpreter needs to make the client feel comfortable so that they can communicate clearly with the clinician. The interpreter should explore avenues to clarify and re-phrase what the clinician is saying. The interpreter should also judiciously use comforting terms and phrases. In this way, the interpreter makes the client more comfortable by providing extra assistance for them to respond to the prompts.
5. The interpreter should refrain from replicating the tone used by a client when the client is clearly confused. This can make the client feel even more confused and inadequate and is not helpful to the client or the clinician. It seems also that the client is annoyed by the ‘parrot-like’ repetition of the interpreter. Therefore, the interpreter should refrain from interpreting responses that are clearly affirmative ones or ones that are clear in their meaning to the clinician.

An interaction has already commenced and you are in the course of interpreting the clinician’s instructions to a client and interpreting the client’s responses to the clinician. This segment of turns occurs about 15 minutes into the interaction.

**Clinician:**Okay, now we are going to pretend that we are going to go to the shop, I need you to remember what we’re buying there. So, we’re not at the shop yet, but I already have a list of things of things that we need to buy. We will get to the shop in about 5 minutes time and I will ask you what we have to buy.  Ok, so I’ll list the four things that we need from the shop and you repeat them after me.

**Interpreter [in LOTE]:**Okay, now we are going to pretend that we are going to go to the shop, I need you to remember what we’re buying there. So, we’re not at the shop yet, but I already have a list of things of things that we need to buy. We will get to the shop in about 5 minutes time and I will ask you what we have to buy.  Ok, so I’ll list the four things that we need from the shop and you repeat them after me.

**Clinician:**Tea

**Interpreter [in LOTE]:**Tea.

**Client: [in LOTE, speaking slowly]**Tea

**Clinician:**Cooking oil

**Interpreter [in LOTE]:**Cooking oil

**Client: [in LOTE, speaking slowly]**Cooking oil

**Clinician:**Eggs

**Interpreter [in LOTE]:**Eggs.

**Client: [in LOTE ]**Eggs

**Clinician:**Soap.

**Interpreter [in LOTE]:**Soap.

**Client: [in LOTE, speaking slowly]**Soap

**Clinician:**Great.Could you please repeat the list again?

**Interpreter [in LOTE]:**Great.Could you please repeat the list again?

**Client [in LOTE]:**Ummmm. I’m not sure.

**Interpreter [in English]:**Um, I’m not sure.

**Clinician:**Can you tell me what is on the shopping list?

**Interpreter [in LOTE]:**Can you tell me what’s on the shopping list?

**Client: [responding slowly]**Ummmm *slowly*tea?

**Interpreter [in English]:**Um, *slowly* tea

**Clinician:**Yes, great.What else was there?

**Interpreter [in LOTE]:**Yes, great. What else was there?

**Client: [responds slowly]**Cooking oil, eggs, soap.

**Interpreter [in English]:**Cooking oil, eggs, soap.

**Clinician:**So we will be buying all of these things from the shop, and you need to remember them all. Let’s say them again to help you remember.

**Interpreter [in LOTE]:**So we will be buying all of these things from the shop, and you need to remember them all. Let’s say them again to help you remember.

**Client:**Yes, alright.

**Interpreter [in English]:**Yes, alright.

**Clinician:**Great.Could you please read to me what’s on the list again?

**Interpreter [in LOTE]:**Great.Could you please read to me what’s on the list again?

**Client: [responds slowly]**Tea, cooking oil, eggs, soap.

**Interpreter: [in English, slowly]**Tea, cooking oil, eggs, soap.

1. In the scenario above, what are the main things that the interpreter needed to bear in mind?
2. There was nothing in particular to bear in mind. The interaction was easy and straightforward. There was no complex terminology and no interactional issues.
3. It is important that the interpreter transferred into the LOTE what the clinician said, and how they said it by emulating the same tone and pace. The same goes for transferring into English what the LOTE-speaking client said. This applies to multiple repetitions from either the clinician or the LOTE-speaking client.
4. In cases like this, it would have been fine for the interpreter to summarise the clinician´s turns to make the content easier to absorb for the client.
5. It is important that when there is repetition as in this instance, that the interpreter considers adding some prompts or short comments if the client appears confused or tired. This is understandable if the clinician repeats the instructions multiple times. In this case, the interpreter is well advised to ‘keep the client’ on track with helpful reminders and prompts.

You are doing a dementia assessment at a home and the older client's daughter is also present. The client’s daughter keeps interrupting you by providing her own interpreted versions into the LOTE. She also interrupts you interpreting into English by drawing attention to some of the words that you use and suggesting that other words are better.

1. Which ethical principles are relevant to this situation? Tick the four that best apply.
2. Maintaining professional relationships
3. Competence
4. Professional conduct
5. Punctuality
6. Professional development
7. Role boundaries
8. What course of action would you take? Choose one option.
9. You tell the daughter to please stop interpreting and interrupting, as you are the interpreter and she is not
10. You ask the clinician how they would like to proceed with the interview and the interpretation
11. You state you wish to withdraw from the assignment since the daughter is taking over and there is no point for you to be there
